# Supplementary material
Source: Springer Nature journal article supplement (https://www.springermedizin.de/resource/supplementary/12943_2014_1418_MOESM5_ESM.pdf/9552930)

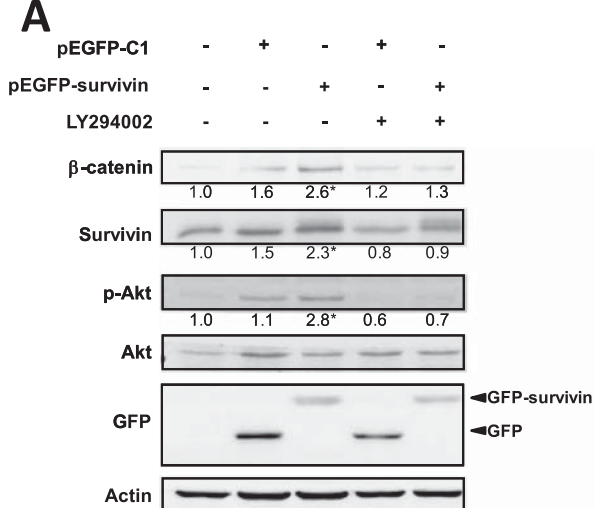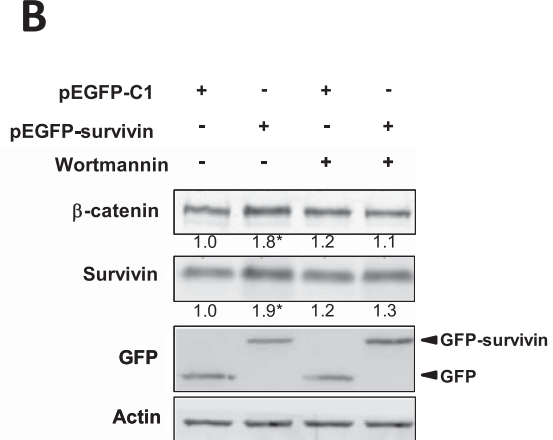

**C**

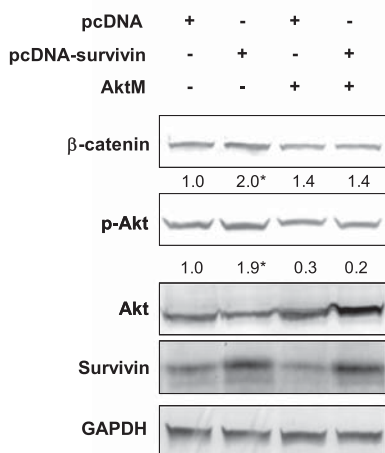

**D**

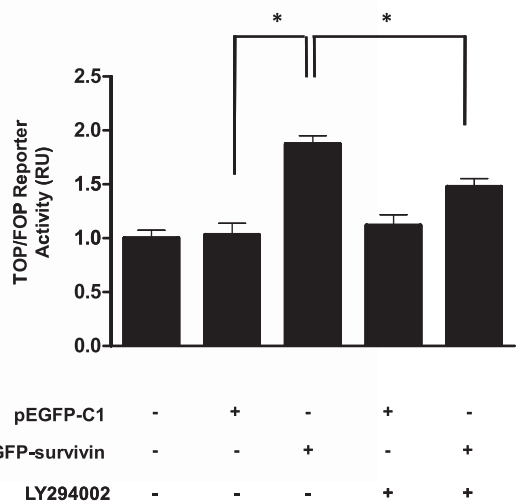

**E**

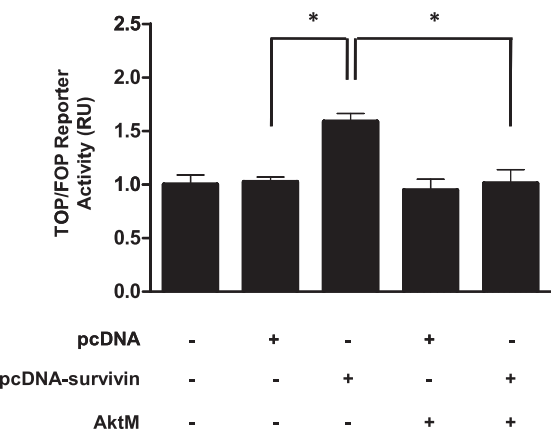

Supplement: MOESM5 [file 9552930]
